# Supplementary material for: Educating Young Educators: A Pedagogical Internship for Undergraduate Teaching Assistants
Source: Atypon-hosted journal article supplement (doi:10.1187/cbe.09-09-0060), 2010-06-01
Supplement: supplemental_material.pdf [file supplemental_material.pdf]

## Appendix I: ED92A teaching internship post-course survey

### Background Information

1. Gender: Male/Female
2. What is your academic standing?
3. What is your intended degree?
4. What is/are your intended major(s)?
5. What is/are your intended minor and/or secondary concentration?
6. When you entered Brandeis, what was your intended major?
7. When you entered Brandeis, what was your intended career path?
8. Why did you take this course?
9. Before taking this course, did you have any tutoring/mentoring experience? If so, please describe.
10. Before taking this course, did you have any classroom/lecture teaching experience? If so, please describe.
11. Before taking this course, had you ever taken a formal education course? If so, please describe.

### Assessment of pedagogy of ED92A

1. Are you taking ED92A for credit? Yes No
2. How many semesters have you taken this course?
  - a. For credit?
  - b. Not for credit?
3. Discussion sections
  - a. On a scale of 1-7 (1= not at all, 7= exceptional), how interesting were the educational papers?
  - b. On a scale of 1-7 (1= not at all, 7= exceptionally difficult), how difficult were the readings to understand?
  - c. On a scale of 1-7 (1= not at all, 7= exceptional), how useful were the discussion sections based on these readings?
  - d. On a scale of 1-7 (1= not at all, 7= exceptional), how relevant were these readings to your experiences in classroom?
  - e. What was the topic you found most interesting? Why?
  - f. What was the topic you found most relevant to your teaching experience? Why?

### Assessment of Teaching Experience

1. How many semesters have you been a teaching assistant?
2. How many times did you lead a Biol18 pre-lab lecture?
3. Have you lectured or led recitation in any other additional course for which you have been a TA? If so, please describe.
4. What did you find most challenging during your TA experience?
5. What did you find most rewarding during your TA experience?
6. What did you find the most surprising about your TA experience?
7. What aspects of the ED92A curriculum were the most useful in the classroom?

### Appendix I (cont.)

8. On a scale of 1 to 7, before taking the ED92A course, rate how comfortable you would feel if required to do or complete the following?
  - Writing a grading rubric
  - Using a grading rubric
  - Preparing a lesson plan
  - Providing one-on-one tutoring/extra help to students
  - Answering student questions during pre-lab lectures
9. On a scale of 1 to 7, given what you have learned in the ED92A course, rate how comfortable you would feel if required to do or complete the following?
  - Writing a grading rubric
  - Using a grading rubric
  - Preparing a lesson plan
  - Providing one-on-one tutoring/extra help to students
  - Answering student questions during pre-lab lectures
10. If you have taken ED92A for multiple semesters. Do you feel each version of the course has provided you with different resources and new perspectives on teaching? Have you found the different versions of the course equally helpful? Why or why not?

### The Final Project

1. Please describe the final project(s) you have completed for ED92A?
2. Did you find the ability to choose your own project helpful? Why or why not?
3. Do you feel like the final project helped you progress as a science educator? Why or why not?
4. If you were to take the class again, what would you propose as your new final project?

### Course Critique

1. What was the most useful aspect of this course?
2. What was the least useful aspect of this course?
3. If you were able to redesign the overall curriculum of ED92A, what would you add? What would you omit?
4. Concerning the discussion sections, what topic would you like to see added to the syllabus?
5. Concerning the discussion sections, what topic would you like to see removed from the syllabus?
6. Would you be interested in participating in teaching opportunities in addition to the Biol18 pre-lab lectures during the course of ED92A?
7. What topics would you add to the Biol18 course curriculum?
8. If you could design an integrated theme for a full semester of ED92A, what would it be? Why?
9. Do you feel that your views on concept-based learning strategies have changed during your studies in ED92A? If so, how?

## **Appendix I (cont.)**

### Post-Analysis

1. What, if anything, did being a TA for Biol18 and participating in ED92A teach about yourself as a student?
2. On a scale of 1-7(1=not at all, 7=extremely) after taking ED92, how likely would you be to do the following?
  - a. Take another semester of ED92A
  - b. TA another course
  - c. Take a formal education class
  - d. Participate in education outreach
  - e. Serve as a tutor
  - f. Participate in educational research
  - g. Incorporate education into your future career plans.
3. Based on your experiences in ED92A, have your intended career goals and/plans changed? If so, how and why?
4. Is there anything else you would like us to know about ED92A? If yes, feel free to share any thoughts in the space provided below.
